## Adenoid Facies

Annie J. Sheeba, M.D., Satvinder Singh Bakshi, M.S., D.N.B.

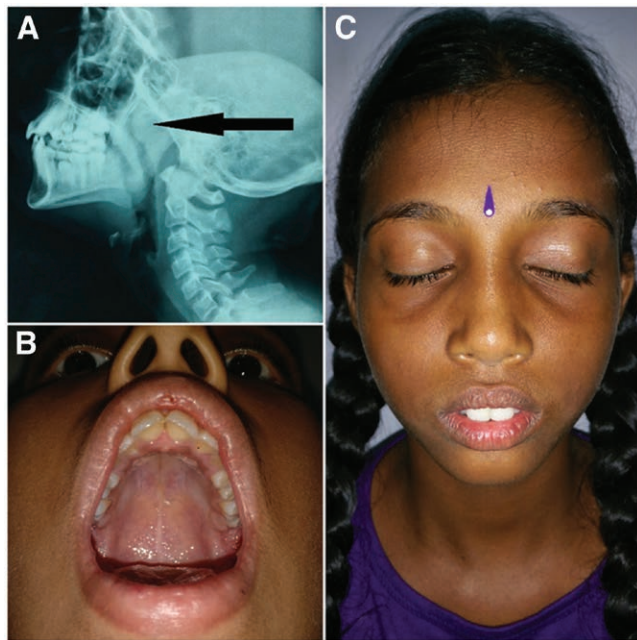

A 13-YR-OLD girl came for orthodontic correction of the facial features during general anesthesia with nasal intubation. Preanesthetic evaluation revealed a 9-month history of nasal obstruction, snoring, and typical adenoid facies. Nasopharyngeal x-ray was significant for adenoid hypertrophy (Panel A, *arrow*). Adenoid facies<sup>1</sup> is defined as the open-mouthed appearance in children, associated with a narrow nose, shortened upper lip (Panel B), narrow palate, high palatal vault, and dental crowding (Panel C).

Identification of these adenoid features is prudent as hypertrophic adenoids not only cause mechanical obstruction but also increase the risk of complications of nasal intubation like bleeding, traumatic avulsion of adenoids,<sup>2</sup> and aspiration.<sup>3</sup> This is even more important in children undergoing dental procedures as nasal intubation is commonly employed. A thorough preoperative assessment with radiographs of the skull in lateral view along with endoscopic evaluation may be of assistance, and nasal intubation guided by flexible fiberoptic may be considered.

### Competing Interests

The authors declare no competing interests.

### Correspondence

Address correspondence to Dr. Bakshi: [saty.bakshi@gmail.com](mailto:saty.bakshi@gmail.com)

### References

1. Quick CA, Gundlach KK: Adenoid facies. *Laryngoscope* 1978; 88(2 pt 1):327–33
2. Chen HH, Chen LC, Hsieh YH, Chen MK, Chen CH, Cheng KI: Unintended avulsion of hypertrophic adenoids in posterior nasopharynx: A case report of a rare complication caused by nasotracheal intubation. *Case Rep Anesthesiol* 2014; 2014:980930
3. Ng SY, Yew WS: Nasotracheal tube occlusion from adenoid trauma. *Anaesth Intensive Care* 2006; 34:829–30

Charles D. Collard, M.D., served as Handling Editor for this article.

From the Department of Anesthesiology (A.J.S.), and the Department of Otolaryngology and Head and Neck Surgery (S.S.B.), Mahatma Gandhi Medical College and Research Institute, Pillaiyarkuppam, India.

Copyright © 2018, the American Society of Anesthesiologists, Inc. Wolters Kluwer Health, Inc. All Rights Reserved. *Anesthesiology* 2018; 129:334
